# Supplementary material for: Fabrication of Large-Area Molybdenum Disulfide Device Arrays Using Graphene/Ti Contacts
Source: MDPI journal article supplement (doi:10.3390/molecules26154394), 2021-07-21
Supplement: s1 [file s1]

## *Supplementary Materials*

# Fabrication of Large-Area Molybdenum Disulfide Device Arrays using Graphene/Ti Contacts

Myungwoo Son <sup>1,†</sup>, Jaewon Jang <sup>2,†</sup>, Dong Chul Kim <sup>3</sup>, Seunghyup Lee <sup>3</sup>, Hyo-Soon Shin <sup>3</sup>, Moon-Ho Ham <sup>4</sup>, and Sang-Soo Chee <sup>3,\*</sup>

<sup>†</sup> These authors contributed equally to this work.

<sup>1</sup>Artificial Intelligence and Energy Research Center, Korea Photonics Technology Institute (KOPTI), Gwangju 61007, Republic of Korea

<sup>2</sup>School of Earth Sciences and Environmental Engineering, Gwangju Institute of Science and Technology (GIST), Gwangju, 61005, Republic of Korea

<sup>3</sup>Nanomaterials and Nanotechnology Center, Korea Institute of Ceramic Engineering and Technology (KICET), Jinju-si, Gyeongsangnam-do 52851, Republic of Korea

<sup>4</sup>School of Materials Science and Engineering, Gwangju Institute of Science and Technology (GIST), Gwangju, 61005, Republic of Korea

\*Correspondence: sschee@kicet.re.kr (S.S.C.)

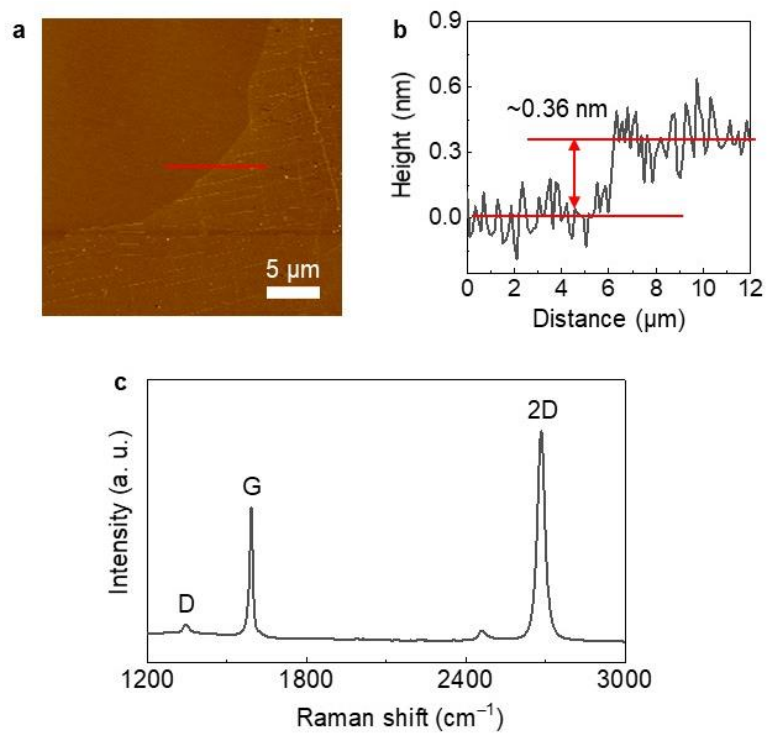

**Figure S1.** (a) AFM image, (b) line profile graph extracted from the red line in Fig. S1a, and (c) Raman spectrum of CVD-grown graphene film on a Si/SiO<sub>2</sub> substrate.

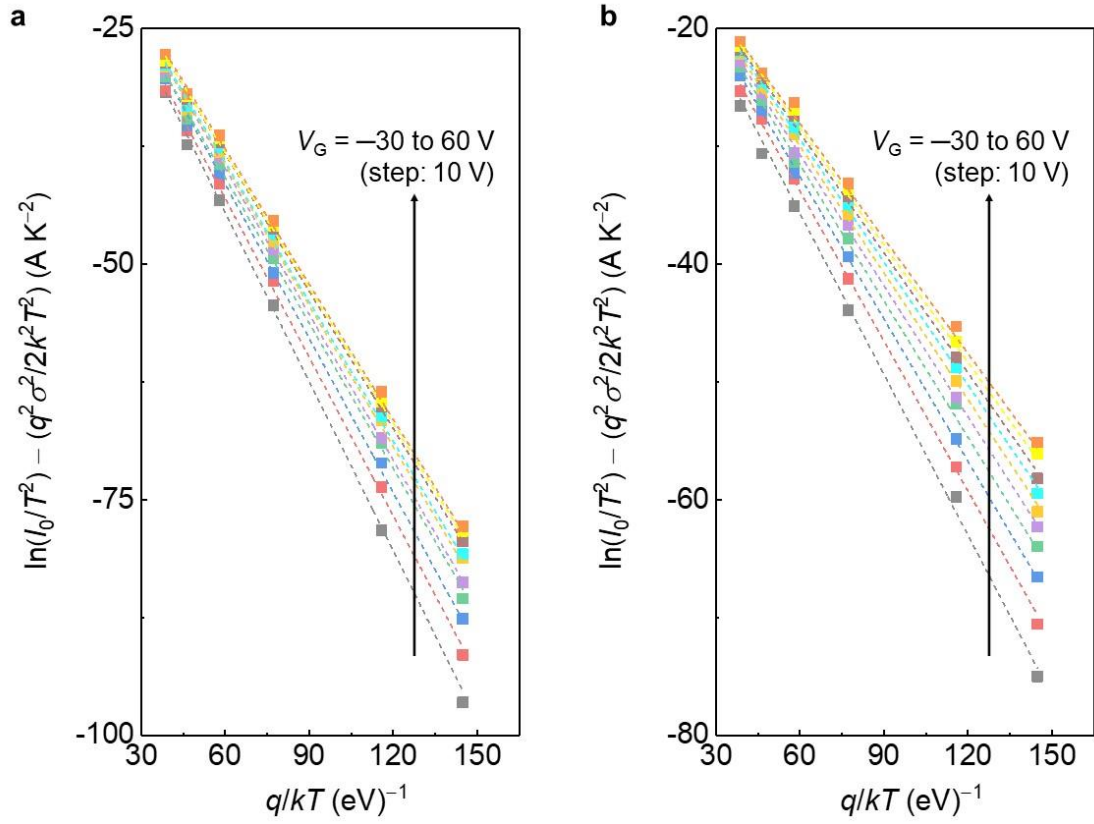

**Figure S2.**  $\ln(I_0/T^2) - (q^2 \sigma^2 / 2k^2 T^2)$  vs.  $q/kT$  plots of MoS<sub>2</sub> devices with (a) Ti and (b) graphene/Ti contacts, as a function of the gate voltage.

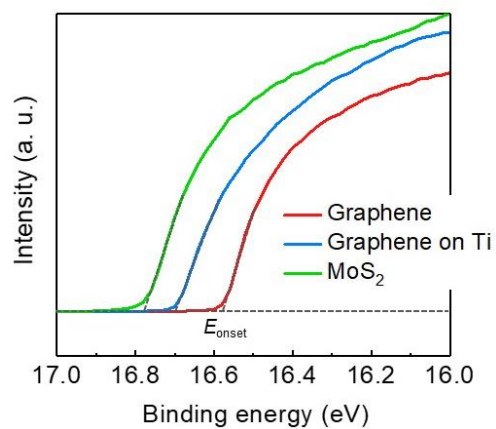

**Figure S3.** (a) UPS spectra of CVD-grown graphene (red), graphene on Ti substrate (blue), and CVD-grown MoS<sub>2</sub> films (green).

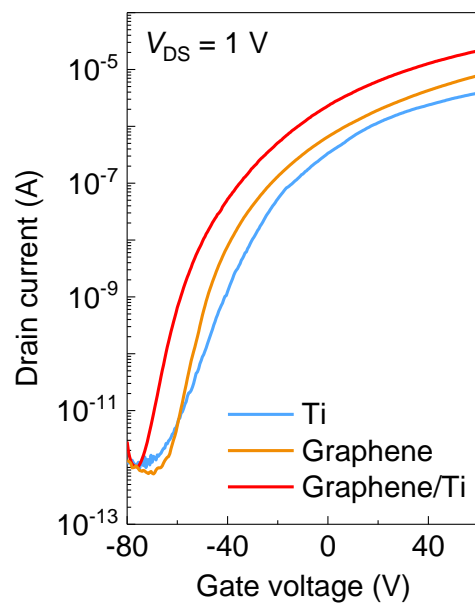

**Figure S4.** Transfer characterizations of MoS<sub>2</sub> devices with Ti, graphene, and graphene/Ti contacts. The data of Ti and graphene/Ti-contacted devices are taken from Fig. 2c.

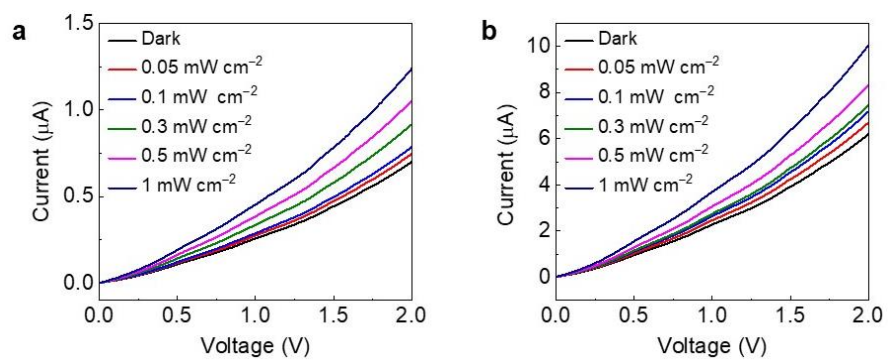

**Figure S5.** Power dependent *I-V* curves of MoS<sub>2</sub> devices with (a) Ti and (b) graphene/Ti contacts in the dark and under 470 nm light illumination.
